# Supplementary material
Source: PubMed Central journal article supplement (PMC8195866)
Supplement: NIHMS1698134-supplement-Source_Data_Figure_4_Uncropped_images_of_cytokine_array_profiling.pdf [file NIHMS1698134-supplement-Source_Data_Figure_4_Uncropped_images_of_cytokine_array_profiling.pdf]

HEK293T transient transfection

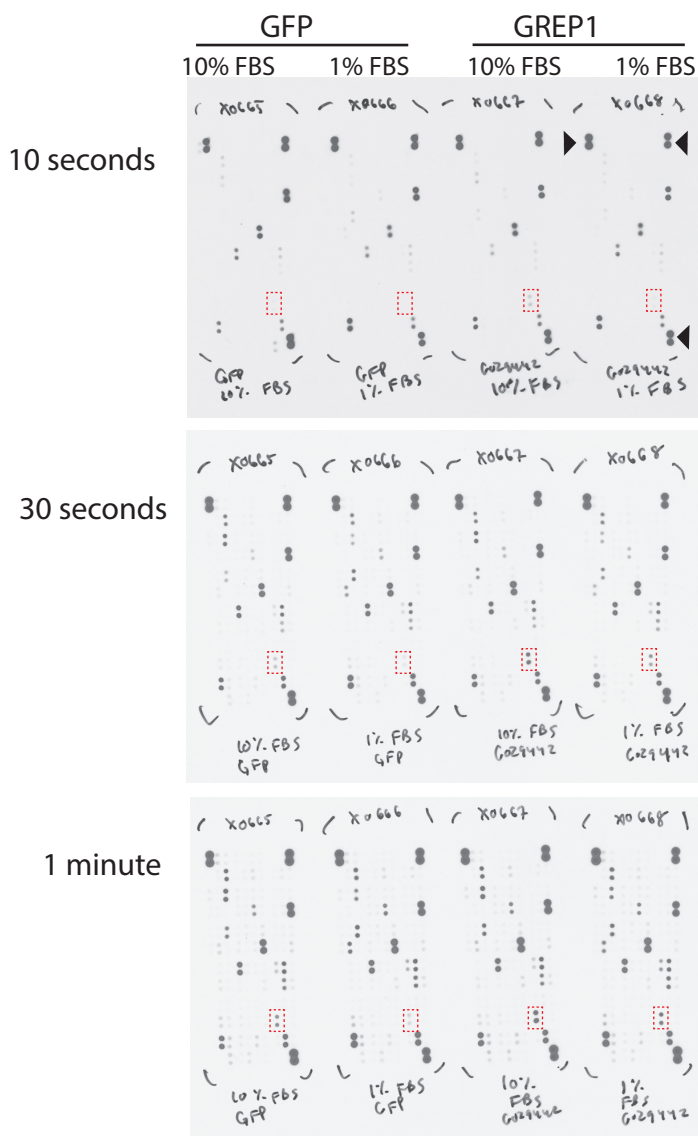

Black arrows - positive controls

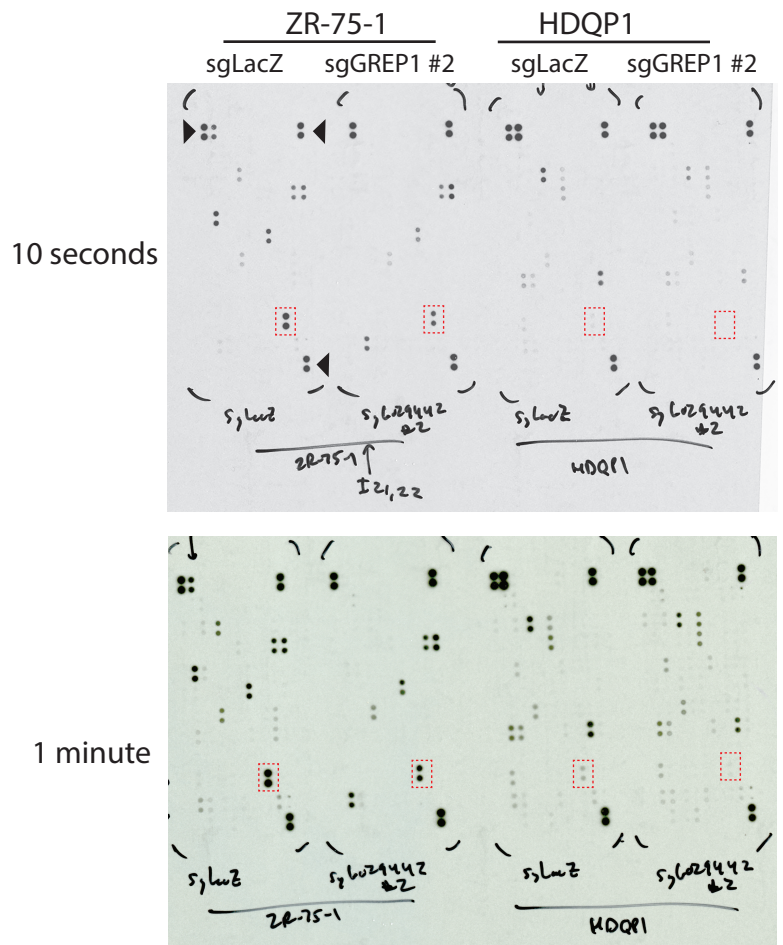

Black arrows - positive controls

**Source Data Figure 4: Uncropped images of cytokine array profiling.** The dotted red box indicates GDF15. Quantification of array signal intensity was used in Figure 4k.
